# Supplementary material for: Antiviral activity of the mineralocorticoid receptor NR3C2 against Herpes simplex virus Type 1 (HSV-1) infection
Source: PubMed Central journal article supplement (PMC6203759; doi:10.1038/s41598-018-34241-w), 2018-10-26
Supplement: 41598_2018_34241_MOESM1_ESM.pdf [file 41598_2018_34241_MOESM1_ESM.pdf]

**Antiviral activity of the mineralocorticoid receptor NR3C2 against Herpes simplex virus  
Type 1 (HSV-1) infection**

Jürgen G. Haas<sup>1</sup>, Julia Weber<sup>1</sup>, Orland Gonzalez<sup>2</sup>, Ralf Zimmer<sup>2</sup>, and Samantha J. Griffiths<sup>1\*</sup>

<sup>1</sup>Division of Infection and Pathway Medicine, University of Edinburgh, Edinburgh EH16 4SB,  
U.K.

<sup>2</sup>Institute for Informatics, Ludwig-Maximilians Universität München, 80333 München,  
Germany.

\*To whom correspondence should be addressed: [samantha.griffiths@ed.ac.uk](mailto:samantha.griffiths@ed.ac.uk)

# Supplemental Figures

## Figure S1

**a**

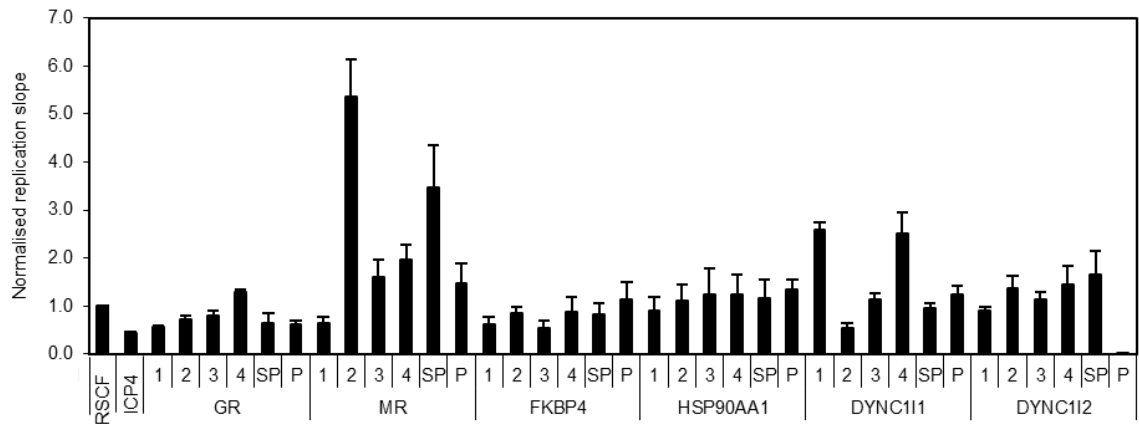

**b**

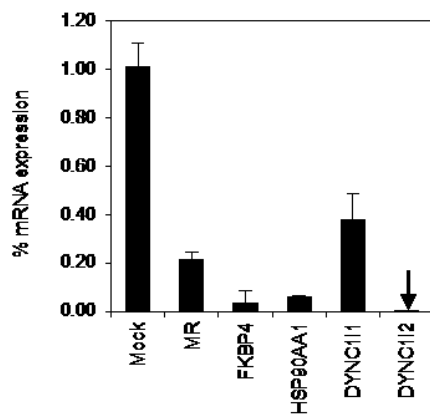

**c**

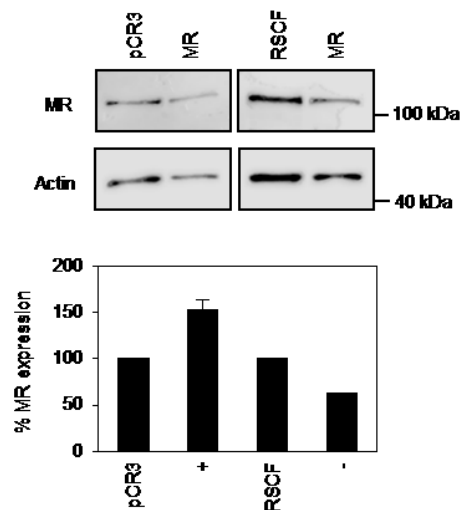

**d**

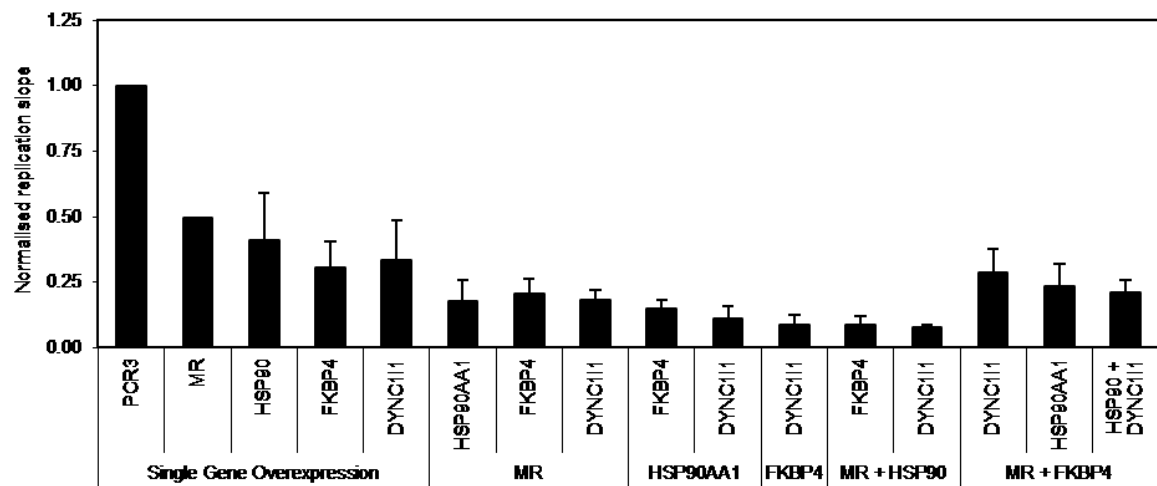

**Figure S1. Validation of the MC signalling pathway as anti-viral to HSV-1.** (a) Validation of siRNA screen phenotypes by siRNA deconvolution. Constituent SMARTpool siRNAs were transfected individually (1-4), and as a reconstituted SMARTpool (SP) into 293T cells, and resultant replication slopes compared to the negative control (RSCF), positive control (ICP4) and the primary screen data (P). The replication phenotype was considered validated if 2 or more of the individual siRNAs gave the same, or better, replication slope. Error bars represent the standard error of the mean of three independent experiments done in triplicates. (b) RT-qPCR confirmation of gene depletion. Gene depletion by siRNAs was confirmed in HeLa cells by RT-qPCR, normalised to the housekeeping gene hypoxanthine phosphoribosyltransferase 1 (HPRT), and relative % mRNA expression in comparison to mock-transfected cells calculated. Gene depletion of at least 60% was observed for all siRNAs tested. Error bars represent standard deviation of technical replicates from a representative experiment. (c) MR protein expression following gene overexpression or depletion. MR was overexpressed (plasmid transfection) or depleted (siRNA transfection) in HeLa cells before MR protein expression was detected by western blot and quantified in ImageStudio following Licor imaging. Band intensity signals ranged from 5,744-79,438 (actin) and 5,521-58,111 (MR). MR expression was normalised to actin. Presented blots and MR expression levels are representative of three experiments carried out in duplicates. Images have been cropped from larger gels for clarity and conciseness, presented as **Fig. S6**, but were run on the same blot and derived from the same experiment. (d) Co-expression of MC signalling pathway members synergistically inhibits HSV-1 replication. 293T cells transiently over-expressing constituent members of the MC signalling pathway alone or in combination were infected with HSV-1-eGFP at MOI 0.5 and replication monitored by GFP fluorescence. Slopes over the linear phase of replication were calculated and normalised to controls (pCR3-transfected cells). Error bars represent the standard error of the mean of at least three independent experiments, carried out in triplicates.



Figure S2

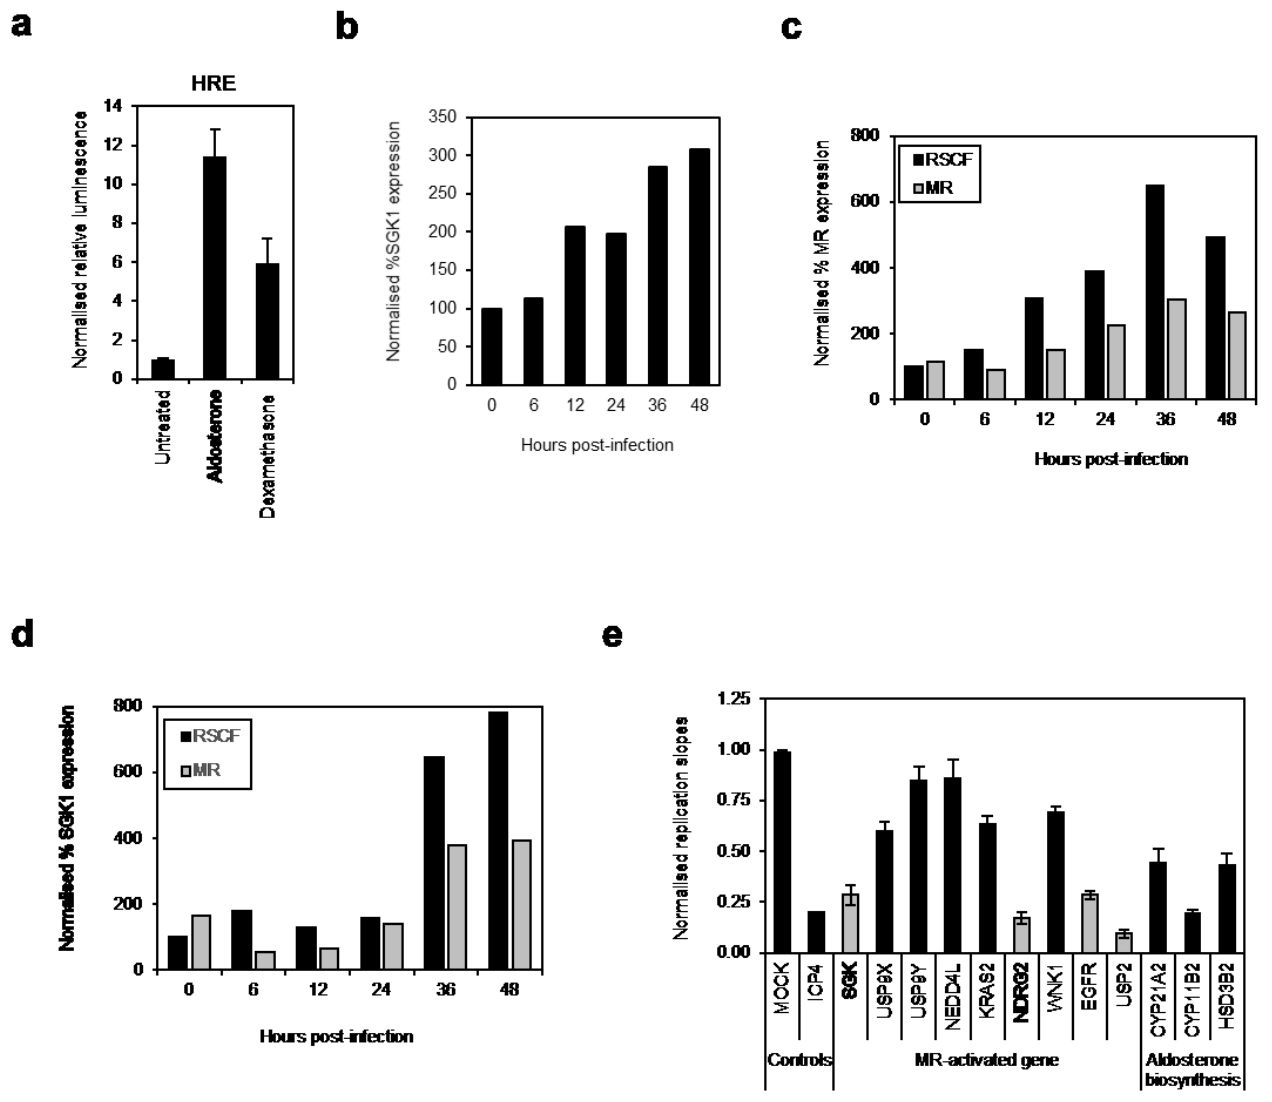

**Figure S2. Expression of MR and MR-regulated genes in response to HSV-1 infection.** (a)

Activation of the HRE by mineralocorticoid and glucocorticoid ligands. HeLa cells were transfected with HRE-luc and stimulated with the synthetic glucocorticoid dexamethasone (1  $\mu$ M) or the mineralocorticoid aldosterone (5  $\mu$ M) for 24 hr before activation of the HRE was determined by quantification of luciferase activity. Error bars represent the standard error of the mean of at least three experiments carried out in triplicates. (b) SGK1 expression increases at the protein level in response to HSV-1 infection. HeLa cells were infected with HSV-1 (MOI 1), and SGK1 detected by western blot in samples harvested at 0, 6, 12, 24, 36, and 48 h post-infection was normalised to actin at each time-point and expressed as a % of expression in uninfected cells (0 hr post-infection). Expression levels presented are representative of three experiments carried out in duplicates. (c) MR expression in response to HSV-1 infection when MR is depleted. HeLa cells were reverse-transfected with RSCF or MR-specific siRNA (50 nM) and, after 48 hr, were infected with HSV-1 (MOI 1). MR was detected by western blot at 0, 6, 12, 24, 36, and 48 h post-infection, was normalised to actin at each time-point and expressed as % expression in uninfected cells (0 hr post-infection). Expression levels are representative of two experiments carried out in duplicates. (d) SGK1 expression in response to HSV-1 infection when MR is depleted. HeLa cells were reverse-transfected with RSCF or MR-specific siRNA (50 nM) and, after 48 hr, cells were infected with HSV-1 (MOI 1). SGK1 was detected by western blot in samples harvested at 0, 6, 12, 24, 36, and 48 h post-infection, was normalised to actin at each time-point and expressed as % expression in uninfected cells (0 hr post-infection). Expression levels are representative of two experiments carried out in duplicates. (e) Transcriptional targets of the MR are largely pro-viral. HeLa cells were reverse-transfected with siRNA SMARTpools against transcriptional targets of the MR and infected with HSV-1-eGFP (MOI 0.5) after 48 hr. Replication was monitored as GFP fluorescence over multiple rounds of replication and slopes over the linear phase were calculated and normalised

to controls. Error bars represent the standard deviation of three experiments carried out in duplicates.

**Figure S3**

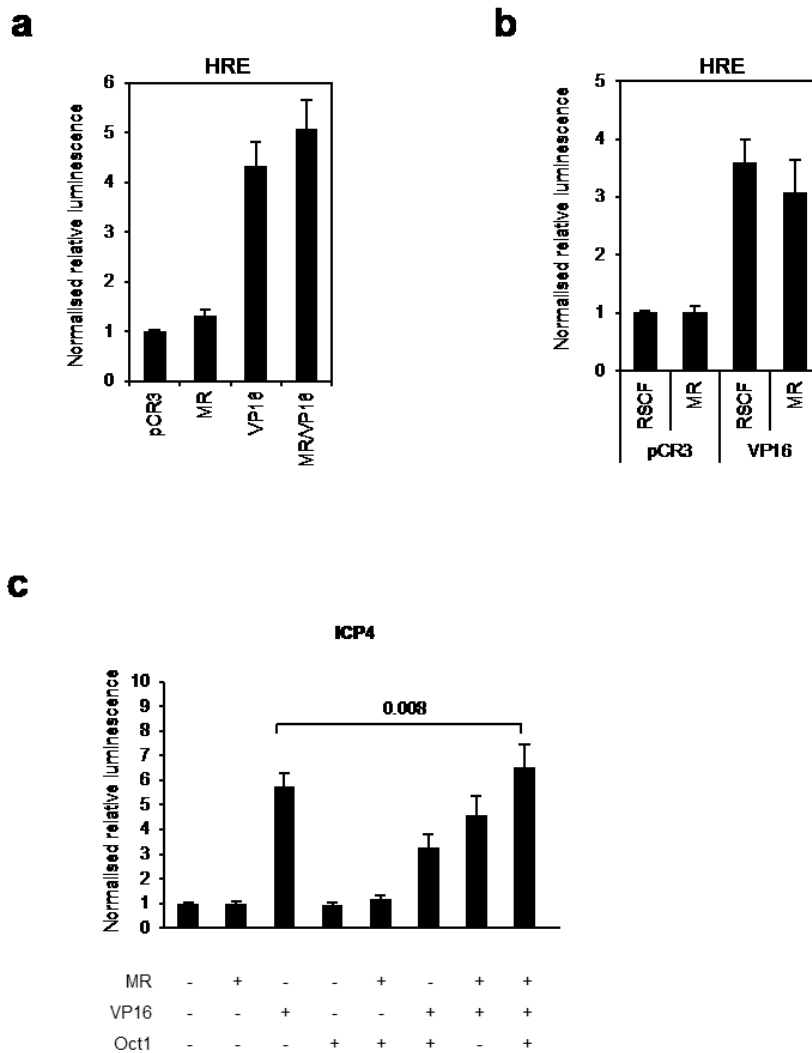

**Figure S3. Modulation of HRE activation by the MR.** (a) Co-expression of the MR with VP16 enhances activation of the HRE. The MR and VP16 were overexpressed in HeLa cells alone or together, with a HRE-luc reporter. After 24 hr, luciferase activity was measured and normalised to control transfected cells (pCR3). Error bars represent the standard error of the mean of four independent experiments carried out in triplicates. (b) Depletion of the MR reduces VP16-mediated activation of the HRE. HeLa cells were reverse-transfected with 20 nM control (RSCF) siRNA or a siRNA targeting the MR. The next day, cells were transfected with a HRE-luciferase reporter, and luciferase activity measured and normalised to control



transfected cells after 24 hr. Error bars represent the standard error of the mean of four independent experiments carried out in triplicates. (c) The viral IE promoter ICP4 is unaffected by co-expression of MR, VP16 and Oct1. The MR, VP16 and Oct1 were transfected into HeLa cells alone or in combinations with the ICP4-luciferase reporter. After 24 hr, luciferase activity was measured and normalised to control transfected cells (pCR3). Error bars represent the standard error of the mean of at least three independent experiments carried out in triplicates. Raw data is provided in **Table S8**.

Figure S4

**a**

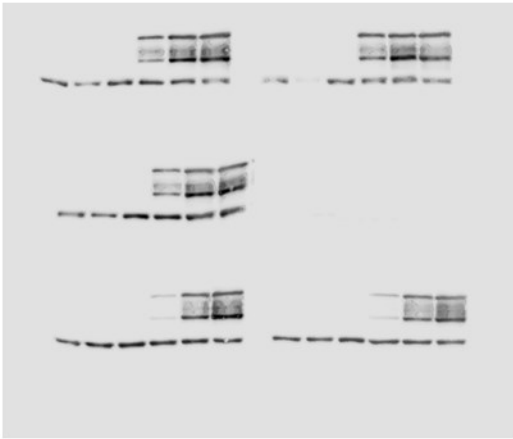

**b**

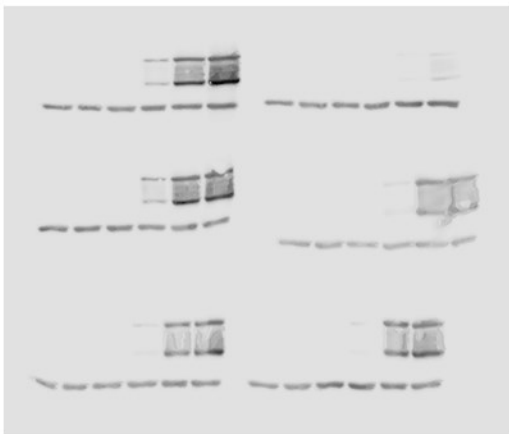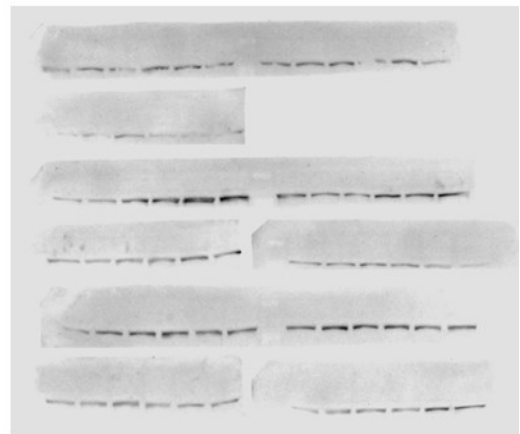

**c**

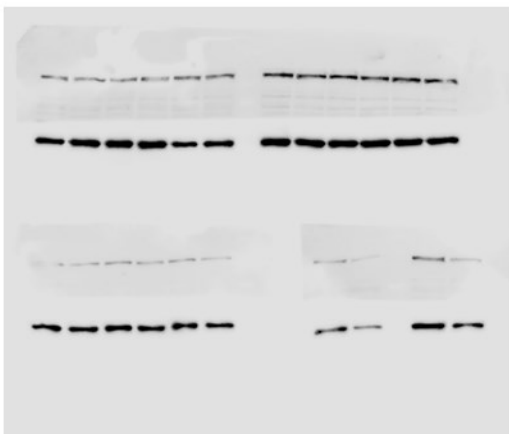

**Figure S4. Full-length western blot gel images.** (a) Full-size gel used for cropped images presented in Fig. 5c, Fig. 7b and Fig. S5b. (b) Full-size gel used for cropped images presented in Fig. 5d. (c) Full-size gel used for cropped image presented in Fig. S2c.

**Figure S5**

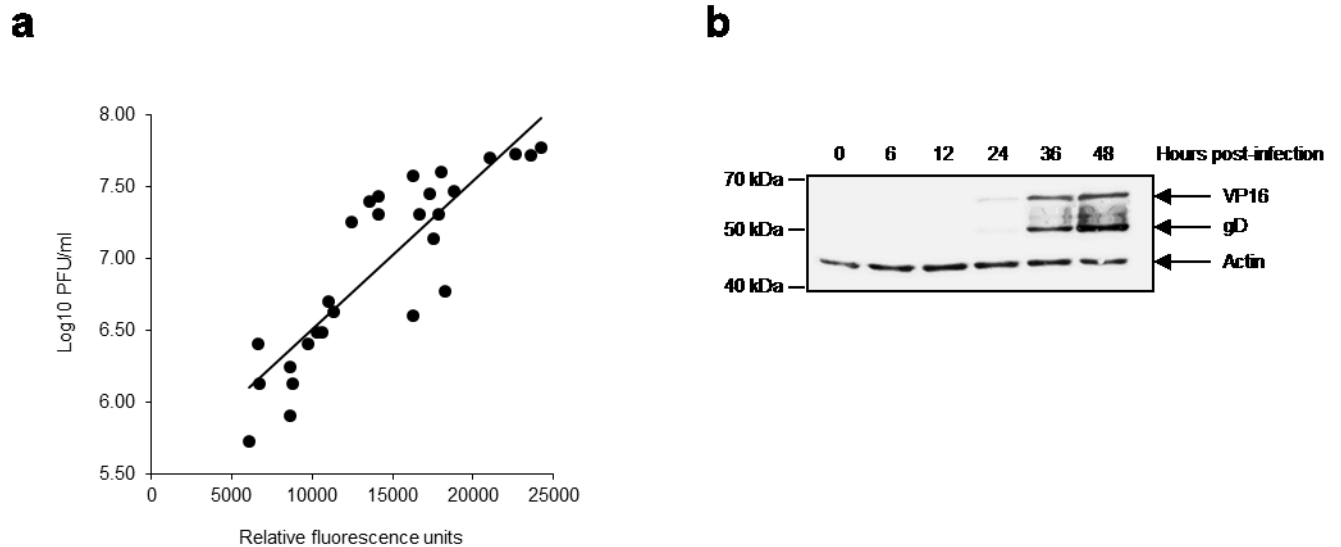

**Figure S5. Replication of HSV-1-eGFP strain C12 correlates with eGFP expression.** (a) Correlation between plaque-forming units and GFP fluorescence. A range of genes were depleted in HeLa cells by siRNA knockdown, before infecting with HSV-1 C12 at MOI0.5. GFP fluorescence was measured over time, and supernatant harvested for quantification of viral titre by plaque assay. Plaque forming units (PFU/ml) were correlated with GFP fluorescence. (b) Confirmation of viral gene expression following infection with HSV-1-eGFP strain C12. HeLa cells were infected with HSV-1-eGFP strain C12 at MOI1, and cells harvested at 6, 12, 24, or 48 hr post-infection. Lysates were run on Western blot and stained for immediate-early (VP16) and early (gD) viral genes, with actin staining for semi-quantitation. Image has been cropped from a larger gel, presented as **Fig. S6**, for clarity and conciseness.

## Supplemental Tables

| Functional Family              | Gene Symbol         | Mean Cell Viability | Standard Deviation |
|--------------------------------|---------------------|---------------------|--------------------|
| General Transcription Factors: | GTF2A2              | 1.00                | 0.03               |
|                                | GTF2B               | 1.13                | 0.08               |
|                                | GTF2E1              | 1.11                | 0.05               |
|                                | GTF2E2              | 1.13                | 0.03               |
|                                | GTF2F1              | 1.09                | 0.01               |
|                                | GTF2F2              | 1.00                | 0.20               |
|                                | GTF2H2              | 1.01                | 0.08               |
|                                | GTF2H4              | 0.96                | 0.07               |
|                                | GTF3A               | 1.09                | 0.12               |
|                                | GTF3C1              | 1.11                | 0.13               |
|                                | GTF3C2              | 0.97                | 0.00               |
|                                | GTF3C3              | 0.87                | 0.07               |
|                                | GTF3C4              | 0.94                | 0.01               |
|                                | GTF3C5              | 1.05                | 0.02               |
|                                | Chromobox proteins: | CBX1                | *0.68              |
| CBX3                           |                     | 1.09                | 0.03               |
| CBX4                           |                     | 0.94                | 0.04               |
| CBX5                           |                     | 1.04                | 0.05               |
| CBX6                           |                     | 0.98                | 0.02               |
| CBX8                           |                     | 1.12                | 0.04               |
| Homeobox proteins:             |                     | HOXA1               | 0.99               |
|                                | HOXA10              | 1.10                | 0.08               |
|                                | HOXA11              | 1.06                | 0.15               |
|                                | HOXA13              | 0.90                | 0.06               |
|                                | HOXA2               | 0.93                | 0.10               |
|                                | HOXA4               | 0.95                | 0.17               |
|                                | HOXA5               | 0.95                | 0.10               |
|                                | HOXA7               | 1.00                | 0.12               |
|                                | HOXA9               | 1.11                | 0.03               |
|                                | HOXB1               | 1.07                | 0.04               |
|                                | HOXB13              | 1.02                | 0.11               |
|                                | HOXB2               | 1.12                | 0.08               |
|                                | HOXB3               | 1.22                | 0.03               |
|                                | HOXB5               | 0.92                | 0.29               |
|                                | HOXB6               | 0.96                | 0.34               |
|                                | HOXB7               | 1.05                | 0.22               |
|                                | HOXC10              | 0.97                | 0.25               |
|                                | HOXC11              | 1.06                | 0.29               |
|                                | HOXC13              | 1.01                | 0.25               |
|                                | HOXC4               | 1.18                | 0.10               |
|                                | HOXC5               | 0.96                | 0.10               |
|                                | HOXC6               | 1.12                | 0.15               |
|                                | HOXC9               | 1.25                | 0.06               |
|                                | HOXD10              | 0.90                | 0.14               |
|                                | HOXD11              | 1.02                | 0.12               |
|                                | HOXD12              | 0.82                | 0.21               |
|                                | HOXD13              | 1.00                | 0.14               |
| HOXD3                          | 0.91                | 0.10                |                    |
| HOXD4                          | 1.11                | 0.11                |                    |
| HOXD8                          | 1.04                | 0.12                |                    |

|                                               |          |      |      |
|-----------------------------------------------|----------|------|------|
|                                               | HOXD9    | 1.02 | 0.12 |
| Steroid hormone receptors:                    | NR0B1    | 1.10 | 0.04 |
|                                               | NR0B2    | 1.08 | 0.01 |
|                                               | NR1D1    | 0.91 | 0.15 |
|                                               | NR1D2    | 0.82 | 0.15 |
|                                               | NR1H2    | 0.83 | 0.15 |
|                                               | NR1H3    | 1.01 | 0.03 |
|                                               | NR1H4    | 1.04 | 0.06 |
|                                               | NR1I2    | 1.05 | 0.01 |
|                                               | NR1I3    | 1.08 | 0.03 |
|                                               | NR2C1    | 1.13 | 0.03 |
|                                               | NR2C2    | 1.12 | 0.01 |
|                                               | NR2E1    | 1.29 | 0.06 |
|                                               | NR2E3    | 0.97 | 0.03 |
|                                               | NR2F1    | 1.07 | 0.06 |
|                                               | NR2F2    | 1.00 | 0.08 |
|                                               | NR2F6    | 1.02 | 0.07 |
|                                               | NR3C1    | 0.99 | 0.04 |
|                                               | NR3C2    | 1.15 | 0.07 |
|                                               | NR4A1    | 1.13 | 0.06 |
|                                               | NR4A2    | 0.93 | 0.05 |
|                                               | NR4A3    | 1.18 | 0.05 |
|                                               | NR5A1    | 1.13 | 0.06 |
|                                               | NR5A2    | 0.96 | 0.02 |
| NR6A1                                         | 1.04     | 0.03 |      |
| Mineralocorticoid signalling pathway members: | FKBP4    | 1.00 | 0.04 |
|                                               | FKBP5    | 1.00 | 0.07 |
|                                               | HSP90AA1 | 1.22 | 0.09 |
|                                               | DYNC111  | 1.17 | 0.03 |
|                                               | DYNC112  | 0.88 | 0.09 |

**Table S1. Effect of gene depletion on HeLa cell viability.** \*, cell viability falls below the 70% cut-off (0.7).

| Gene Symbol                           | siRNA 1              | siRNA 2              | siRNA 3              | siRNA 4              |
|---------------------------------------|----------------------|----------------------|----------------------|----------------------|
| <b>General Transcription Factors:</b> |                      |                      |                      |                      |
| GTF2A2                                | GAAACAGUCUUCAGGAGAG  | GCGAUAAUGUGUGGACUUU  | GAGGUGACAGAACUUAUUA  | CUAAAAACGUACAGAUUCU  |
| GTF2B                                 | GAAAUUGGUCGGUGUUUUA  | ACAAUCAGACAGUCCUAUA  | GCUAGAAACCAGUGUGGAU  | ACAUAUAGCCCGUAAAGCU  |
| GTF2E1                                | GAACUUGGCCUAUGAAAUA  | UAACAUGGAUGACCAAGAA  | CAACCGGGCUUCCUUCAAA  | GGAGACAAGUUUAUCAAAU  |
| GTF2E2                                | GACCAGAUACUAAUUGUAA  | GCAUGACCAGCGAGGAUUA  | GCUUUAAGACUCAUAACGA  | AGUACAACGUGAGAGAUAA  |
| GTF2F1                                | GCAAGAUGAUCAACGACAA  | GAGAACACGUCCUACUACA  | GAAGAAGUACGGCAUCGUC  | GAAUACGUCGUUCGAGUUC  |
| GTF2F2                                | GAAAGAAGACGGAAAAGCGA | UAGUCAAGGUUCCUAAAUA  | CAUCAGAUAAAGCUGUCAU  | AGUCAGUGCUCUAGAGAA   |
| GTF2H2                                | AGACUGACGUGUACUUUUA  | GGAAUGAUGCGCCACUUU   | ACAUACAAGUCGAGAAGUA  | GCGAUCCAUCUAAUUAUUUA |
| GTF2H4                                | GCUCAGCUCUGGUACUUUA  | GAACCGAGUACACCUACAA  | CUGAGGGUGUCCUGUAUAA  | GCUGUAGCUCUGUGGGUAA  |
| GTF3A                                 | GAAACAAGGGCAAGGCCUUA | CCAUAAAAGAGAAAUAUA   | GCAAUGAAAACAAAGUCUCA | GACCAUUUGUUUGUGACUA  |
| GTF3C1                                | GAAGGUCUCUUGCGAUUGU  | GACCGAAACCGGAGAGUGA  | GAACGGAGAACGAUAAAGC  | GUACAAGAGGGCGUACAUI  |
| GTF3C2                                | UCUGUGGGAUUCUUAUUAU  | CGACUGGCUCUGGGACAAUA | CUUCAUUGGUGCAAAGCUA  | GAGCCCACUCAAUGCUAU   |
| GTF3C3                                | GAUGUUACUUCUGCUAUUA  | GAAUGUUACCUGCACUAUA  | GUCCGGAACUCAUCGACUA  | GCCCAAGUUUGUUUGAUUA  |
| GTF3C4                                | GAAGUGUAGUUGCAGCUUA  | CGACUGGAUUAAGAGGUUA  | GAAUGGAACAGUCUAUACU  | GAUUGGACAUUUCUCAAAG  |
| GTF3C5                                | GCAGAUGUUCUACCAGUUA  | GCAAGCAUACGUCAAUGUA  | CGAAUCCGUUGUGGAAUGA  | ACUCCGAGGUCACAUUUGA  |
| <b>Chromobox proteins:</b>            |                      |                      |                      |                      |
| CBX1                                  | GCGCAAAGCUGAUUCUGAU  | GGAAGGGAUUCUCAGAUGA  | CAGAAGAGAACCUGGAUUG  | GCCCACAGGUUGUCAUAUC  |
| CBX3                                  | UCAGAAAAGCUGGCAAAGAA | AGAAUUGAUUGAAGCGUUU  | UGAAGAAUUUGUCGUGGAA  | AGUACUAGAUCGACGUGUA  |
| CBX4                                  | GCAAGAAGCACCACCAGUA  | GCUGGUCGCCCAAUAUUA   | UGGAGUAUCUGGUGAAAUG  | AGACCUGGAUGAACC CAUA |
| CBX5                                  | GGAUUGCCCUGAGCUAAUU  | CAAGUGGAAUAUCUACUGA  | AGAGAGAGCAGAGCAAUGA  | UAGACAGGCGCGUGGUUAA  |
| CBX6                                  | GAAAGGGACGCAUCGAGUA  | ACACAGAUCGCCACAUGA   | GGCCGAAUCCAUCAUCAA   | GAUGUGCAUUUCUCUGUCA  |
| CBX8                                  | GGAAAGGACGCAUGGAAUA  | GGACGUGACCUCAAAACUUU | UAACACGGACCAAGGCUUU  | GCUCGCAGCCUUUGAGGAA  |
| <b>Homeobox proteins:</b>             |                      |                      |                      |                      |
| HOXA1                                 | GAUUACAACUUUCCAGUCG  | GAACUUCAGUGCGCCUAC   | GACGACCGCUUCCUAGUGG  | ACGAGAAGGCCGAGGAAUC  |
| HOXA10                                | CCAACUGGCUCACGGCAA   | GCAAAGCCUCGCCGAGAA   | UCACAGCCAACUUUAAUUU  | GCAAAGAGUGGUCGGAAGA  |
| HOXA11                                | UAACAGAGACCGUUUACAG  | GCGUCUACAUAACAAAGA   | CAGCAAAUCCACUCCUCUA  | GCUCCUCUACAUGUAUUU   |
| HOXA13                                | GGGAAUACGCCACGAAUUA  | GCGGACAAGUACAUGGAUA  | AAGAAGCGCGUGCCUUAUA  | GACAAACGGAGGCGGAUUA  |
| HOXA2                                 | GGAGCUGGCCUAAACAAUG  | GGAAUUGACUGAGAGACAA  | GAGAACUGCUUACACCAAC  | CCGUAGAUUUUCAGCUGA   |
| HOXA4                                 | GCAAGGAGCCCUGGUGUA   | AAGAUGCGAUCCUCAAUU   | CUACAUCGAGCCCAAGUUC  | GCCCACACGCUCUGUUUGU  |
| HOXA5                                 | CAUAAGUCAUGACAACAUA  | GCAGAAGGAGGAUUGAAAU  | CGGACUACCAGUUGCAUAA  | GCAGGUACGGCUACGGCUA  |
| HOXA7                                 | GAAAGAGCAUAAGGACGAA  | GUUCCGGGCUUAUACAAUG  | CAAAGGCGCCUGCGACAAG  | CGUAUUUUGUGAACGCGCU  |
| HOXA9                                 | GCGCCGACGCCGCGGAUGA  | GCGGAUGAGCUGAGCGUUG  | GCAACUACUACGUGGACUC  | AGUCCAAGGCGACGGUGUU  |
| HOXB1                                 | GCUACGGGCCUUCUCAGUA  | GGAGAUGCCUCAGACCAGU  | UGAAACACAGGUCAAGAUU  | UCGACUGGAUGAAGGUUAA  |
| HOXB13                                | GAACAGCGCUACCCCUUUA  | CCACUGAGUUUGCCUUCUA  | GAACCCACCAGGUCCCUUU  | GUAUGCGGCUAACAAGUUC  |
| HOXB2                                 | CGAGUUCUUUGGAUGAAA   | GCCUUUAGCCGUUCGCUUA  | GAGGGAGAUUUGGUUUUAUA | CAAGGAGUCGACAUUAAUU  |
| HOXB3                                 | CCAAGAAGCGCCCAAUUA   | AGGCAAACGUCCAAGCUGA  | GGUAAAAGCCCACCAGAAUG | GCCACUAGCAACAGCAGUA  |
| HOXB5                                 | GCUCUUACGGCUACA AUUA | UGAGGAAGCUUCACAUCAG  | GGGCAGACUCCGCAGAUUA  | GCGUAUACCCGCUACCAGA  |

|        |                     |                     |                      |                     |
|--------|---------------------|---------------------|----------------------|---------------------|
| HOXB6  | CGGACCCGCUGAGACAUUA | CGGAUGAAUUCGUGCAACA | UGACGGAGAGGCAGAUCAA  | GCGCAGGACAAGAGCGUGU |
| HOXB7  | GAACAAACUUCUUGUGCGU | GCGCCAAGGAGCAGAGGGA | ACUUGGCGGCCGAGAGUAA  | GAGAGUAACUUCGGAUCU  |
| HOXC10 | GAGAUUAGCAAGACCAUUA | GAGAAUGUCUGCUGCAUGU | GCAAAGUGAGUUUCCUGA   | CGGAUAACGAAGCGAAAGA |
| HOXC11 | CAACGUGUAUAUCAACAAA | GCGCUGCCCUUAUUCGAAA | GCAAAGUGGCACCAUCGGAA | CGGGAAAUCCUCUGCUGUA |
| HOXC13 | GCAAGAAACGCGUGCCCUA | GUGACGACCUGUCCUCUAG | GCAAAUCGAAAGCGCCUCA  | AGGAAUACGCGGCUAGCAA |
| HOXC4  | CUACAUCGAUCCGAAAUUU | GCAAGCAACCCAUAGUCUA | GGACAUUACCAGGUUAUAA  | CGUAUUUGAUGGACUCUAA |
| HOXC5  | GGAUUGGACUUAAGCAUCA | CCAAUAUCCCGCCUAUAA  | CUACGUAGCCAAUUCAUUC  | UGACCAAACUGCACAUAG  |
| HOXC6  | CUAUGGAUCUAAUUCUUU  | AAGCCAGUAUCCAGAUUUA | GACAUGCUCUCAAACUGCA  | CCUAUGAUCCAGUGAGGCA |
| HOXC9  | GCUCAUCUCUCACGACAAU | GUGCCGACUGUAGCGAAU  | GACACGCGCUACAUGCGGA  | GGGCCAUCAGUAACUAU   |
| HOXD10 | CGAAUAGAGCAACCGUUA  | GAGAUCAGUAAGAGCGUUA | UUUAUACCUCAGUAGAC    | AAACCCAAGAGUACAAUAA |
| HOXD11 | GAGAAGAGCAGCAGCGCAG | GAGCGCAGCCAGCAUGUAC | CGUCUGACUUCGCUAGCAA  | CAACCGUCGUCCUGCCAGA |
| HOXD12 | CCGAAGAGCAGGCUAAGUU | UCUCAAGCGGCCAAGUAU  | CUACAGAGCGGCCUAUGUG  | GGAGUUGGAGAACGAAUUC |
| HOXD13 | GAACCUAUCUGAGAGACAA | ACACCAAACUGCAGCUAA  | GAACGAGUAUGCCAUUAA   | GGACAUGUGCGUCUACCGA |
| HOXD3  | CGACAGAACUCCAAGCAGA | GCGCGCAGCUGGUGGAAU  | GGAGAGAGCUGCGAGGACA  | GCAACUUCGUCGAGUCCAU |
| HOXD4  | UGAAAUCGCUCACACCCUG | ACACGGACCUGACGACCU  | GGUCAUGAGUUCGUUAUUG  | CAACUACACCGGUGGGGAA |
| HOXD8  | CCGAAGGCCUGACAAAUUA | AAUCAGAGCUCGUCUCCU  | UUACGGAUACGAUAACUUA  | AGGCCGAGCUGGUACAAUA |
| HOXD9  | GAAUUCUCUUAACAUGU   | CCAAUACCAGACGCUUGA  | GAGUUCGCCUCGUGUAGUU  | GCUACGAGGUGGCCAGGAU |

Steroid hormone receptors:

|       |                     |                      |                      |                      |
|-------|---------------------|----------------------|----------------------|----------------------|
| NR0B1 | CAGCAUGGAUGAUUGAUG  | CUGCUGAGAUUCAAAUG    | ACAGAUUCAUCGAACUUA   | GAACGUGGCGCUCUGUAC   |
| NR0B2 | GAAUUGCCUGCCUGAAAG  | GGAUUAUGCCUGCCUGAAA  | CGUAGCCGCGCCUUGUA    | GCCAUUCUCUACGCACUUC  |
| NR1D1 | GCAUGGACGCAGUGGGCGA | GGCAUGUCUCGAGACGCU   | CGGCAGGGCAACUCAAAGA  | GGGCGAACGGUGCAGGAGA  |
| NR1D2 | GAAGAAUGAUCGAAUAGAU | GAACAUGGAGCAAUAUAAU  | GAGGAGCUCUUGGCCUUA   | UAAACAACAUGCACUCUGA  |
| NR1H2 | CUAAGCAAGUGCCUGGUUU | GCUAACAGCGGCUCAAGAA  | AGGCGAGGGUGUCCAGCUA  | GAAGAAGAUUCGAAACAG   |
| NR1H3 | GAACAGAUCGCCUGAAGA  | GAGUUUGCCUUGCUCUUG   | UGACUUUGCUAAACAGCUA  | CAAGGGAGCGCACUACAUC  |
| NR1H4 | CAAGUGACCUCGACAACAA | GAAAGAAUUCGAAUAGUG   | CAACAGACUCUUCUACAUI  | GAACCAUACUCGAAUACA   |
| NR1I2 | GAUGGACGCUCAGAUGAAA | CAACCUACAUGUCAAAGG   | CAGGAGCAAUUCGCAUUA   | GCUCAUAGGUUCUUGUUC   |
| NR1I3 | CCUCUUCGCUCACAAUUG  | GAACAGUUUGGCAGUUUA   | UUAAUGCGCUGACUUGUGA  | GUGGAAAUCUGUCACAUCG  |
| NR2C1 | GGAAGGAAGUGUACACCUA | GAGCACAUCUCAAACUAC   | GGAUCAAGGAUUGUAUUA   | UCUCAGCGAUUCACAUGUA  |
| NR2C2 | CUGAUGAGCUCCAACAUAA | CAACCUAAGUGAAUCUUG   | GAAGACACCUACCGAUUGG  | GCGCCAAGCAACUCAUUAU  |
| NR2E1 | GAUCAUAUCGAAAUACAG  | CAAGACUGCUUUCAGAUUA  | GUUAGAUGCUCUGAAUUA   | CAAUGUAUCUCUAUGAAGU  |
| NR2E3 | GAGAAGCUCCUUGUGAUA  | GAAGCACUAUGGCAUCUUA  | GAAGGAUCCUGAGCACGUA  | GAAGCUCCUUGUGAUUG    |
| NR2F1 | GAAACUCUCAUCCGCGAUA | UCUCAUCCGCGAUUGUUA   | GGAACUUAACUUAACAUG   | GCAAACUGCUGCUGCGACU  |
| NR2F2 | GUACCUUGCCGGAUUAUU  | CCAACCAGCCGACGAGAUU  | ACUCGUACCUUGCCGGAUA  | GGCCGUUAUUGGCAAUUA   |
| NR2F6 | CGACGCCUGUGCCUCUCA  | CAGCCGGUGUCCGAACUGA  | CAACCGUGACUGCCAGAUC  | GUACUGCCGUCUCAAGAAG  |
| NR3C1 | GAUAAGACCAUGAGUAUUG | GGACAGAUGUACCACUUAUG | GAGGACAGAUGUACCACUA  | GAACUUCUCCUGGUCGAACA |
| NR3C2 | GCAAACAGAUGAUCCAAGU | CAGCUAAGAUUUAUCAGAA  | GGUAUCCGGUCUUAAGAAUA | GACCUAGUCUUUAAUGAAG  |
| NR4A1 | GAAGGAAGUUGUCCGAACA | CGGCUACACAGGAGAGUUU  | UCGAGGACUUCAGGUGUA   | GGACAGAGCAGCUGCCCAA  |
| NR4A2 | CCACGUGACUUUCAACAAU | ACAUUCAGAUGCACAACUA  | GGACAAGCGUCGCCGGAU   | CCACCUUGCUUGUACCAA   |



|                                               |                       |                       |                       |                       |
|-----------------------------------------------|-----------------------|-----------------------|-----------------------|-----------------------|
| NR4A3                                         | CAAAGAAGAU CAGACA UUA | GAAGUUGU CCGUAC AGAUA | CGGAAUAC ACCACGG AGAU | CCUCCAUC UGCAUGAUGA   |
| NR5A1                                         | GAUUUGAAGU UCCUGAAUA  | GGAGCGAG CUGCUGGUGUU  | GGAGGUGG CCGACCAG AUG | CAACGUGC CUGAGCUCAUC  |
| NR5A2                                         | CCAAACAUAUG GCCACUUU  | UCAGAGAAC UUAAGGUUGA  | GGAUCCAUC UCCUGGUUA   | CAUAAUGG GCUAUUCAUUAU |
| NR6A1                                         | CAACGAACCUG UCUCAUUU  | GAAGAACU ACACAGAU UUA | GAAGAUGGAU ACGCUGUGA  | CCGAGGACC UGGAACCAU   |
| Mineralocorticoid signalling pathway members: |                       |                       |                       |                       |
| FKBP4                                         | GAGCAGACCU UUAUGUAUU  | CGAAAGAG CUAAAUAUCGA  | GAAGUUGAG UUGAUGAAAAG | GAAGAGAUC ACCGGCGUAA  |
| FKBP5                                         | GGACGUGGUUG UC GAUUUG | GCUAGGAC AUUCAACAGA   | CGACAUCAA UCAGCUAUAU  | CAGACAAAC UUGGUUCUA   |
| HSP90AA1                                      | GCAGAU AUCUCUAUGAUUG  | GAAGUGAU CUUAUGAUUG   | UAUAAGAG CUUGACCAAUG  | GGAUCUCCC UC AAACAUA  |
| DYNC111                                       | GGAAAUUCGUG CUAACAGA  | CAAGGGAAG UAGUGUCCUA  | GACAAUCGC AGUCAUCGAA  | CGGGAGACG UCAAUAACUU  |
| DYNC112                                       | GUAAAGCUUUG GACAACUA  | GAUGUUAUG UGGUCACCUA  | GCAUUUCUG UGGAGGUAA   | GGGAUAACC GUAGCAAUAA  |

**Table S2. siRNA sequences.**

| Gene symbol | Forward <sup>a</sup>        | Reverse <sup>a</sup>    | UPL Number <sup>b</sup> |
|-------------|-----------------------------|-------------------------|-------------------------|
| HPRT        | TGACCTTGATTTATTTGCATACC     | CGAGCAAGACGTTTCAGTCCT   | 73                      |
| NR3C2       | TTTTCTTCAAAAGAGCAGTGGA      | GGACAATTCTTTCGTCGAATCT  | SYBR                    |
| NR3C1       | TCCCTGGTCGAACAGTTTTT        | GCTGGATGGAGGAGAGCTTA    | 45                      |
| FKBP4       | CGGGAGAAGAAGCTCTATGC        | GGTCTCCTGAGGAAGCCTCT    | SYBR                    |
| HSP90AA1    | GTCCTGTGCGGTCACCTAGC        | AAAGGCGAACGTCTCAACC     | SYBR                    |
| DYNC111     | CTGCAGTGGGACACAGACC         | TTTGACACGCCAGTTTATG     | SYBR                    |
| DYNC112     | GCATGGGGAGATTGGATTTA        | ATGGGTCCATCTCACACGAT    | 15                      |
| SGK1        | TCCTAGACTACATTAATGGTGGAGAGT | ATAGAAACGAGCCCCTGGTT    | 38                      |
| IFN-β       | CTTTGCTATTTTCAGACAAGATTC    | GCCAGGAGGTTCTCAACAAT    | 25                      |
| Mx1         | GAAAGAGGCGAAGCGAGAG         | CCGTGACACTGGGATTCT      | 67                      |
| ICP4        | ATGGGGTGGCTCCAGAAC          | CTGCCGGTGATGAAGGAG      | 38                      |
| UL23        | CAACAAAAGCCACGGAAGT         | CGTCTATATAAACCCGCAGTAGC | 1                       |
| gC          | GAGGGTCAGCCGTTCAAG          | AACTCCACGGGGTTACGC      | 70                      |

**Table S3. Primer sequences for RT-qPCR.** Primer:probe assays were designed in the Assay Design Center at <http://www.universalprobelibrary.com> and purchased from Roche.

<sup>a</sup>Primer sequences are 5' to 3'.

<sup>b</sup>UPL number, probe number from the Roche human Universal Probe Library. SYBR, qPCR carried out with SYBR green reagents.

|       |      | 0   | 0.25 | 0.5  | 1    | 3    | 5    | 10   |
|-------|------|-----|------|------|------|------|------|------|
| Exp 1 | RSCF | 174 | 176  | 193  | 206  | 286  | 275  | 298  |
|       |      | 172 | 165  | 200  | 188  | 369  | 389  | 208  |
|       |      | 145 | 160  | 229  | 204  | 346  | 802  | 376  |
|       | MR   | 100 | 107  | 90   | 108  | 138  | 144  | 133  |
|       |      | 165 | 107  | 73   | 108  | 149  | 136  | 102  |
|       |      | 102 | 163  | 87   | 113  | 177  | 181  | 144  |
| Exp 2 | RSCF | 255 | 313  | 963  | 527  | 604  | 520  | 491  |
|       |      | 150 | 469  | 374  | 373  | 634  | 550  | 461  |
|       |      | 253 | 361  | 323  | 511  | 338  | 342  | 531  |
|       | MR   | 181 | 228  | 379  | 448  | 396  | 364  | 474  |
|       |      | 160 | 332  | 238  | 301  | 409  | 349  | 403  |
|       |      | 233 | 265  | 249  | 250  | 407  | 446  | 392  |
| Exp 3 | RSCF | 188 | 243  | 385  | 457  | 753  | 548  | 477  |
|       |      | 182 | 171  | 393  | 817  | 644  | 713  | 678  |
|       |      | 237 | 359  | 326  | 485  | 568  | 695  | 597  |
|       | MR   | 162 | 389  | 309  | 316  | 583  | 384  | 502  |
|       |      | 170 | 198  | 467  | 445  | 764  | 906  | 614  |
|       |      | 173 | 328  | 360  | 552  | 830  | 805  | 636  |
| Exp 4 | RSCF | 260 | 218  | 393  | 494  | 426  | 418  | 408  |
|       |      | 353 | 233  | 297  | 335  | 475  | 587  | 380  |
|       |      | 316 | 347  | 383  | 456  | 600  | 405  | 572  |
|       | MR   | 310 | 305  | 246  | 278  | 391  | 290  | 288  |
|       |      | 293 | 275  | 275  | 298  | 384  | 265  | 414  |
|       |      | 301 | 384  | 254  | 296  | 314  | 391  | 347  |
| Exp 5 | RSCF | 346 | 394  | -    | 364  | 352  | 468  |      |
|       |      | 239 | 253  | -    | 286  | 390  | 469  |      |
|       |      | 274 | 312  | -    | 416  | 543  | 477  |      |
|       | MR   | 291 | 291  | -    | 300  | 479  | 209  |      |
|       |      | 234 | 249  | -    | 246  | 216  | 374  |      |
|       |      | 213 | 272  | -    | 243  | 225  | 206  |      |
| Exp 6 | RSCF | 145 |      | 1219 | 1269 |      | 4021 |      |
|       |      | 186 |      | 619  | 2278 |      | 5207 |      |
|       |      | 149 |      | 1087 | 2643 |      | 6982 |      |
|       | MR   | 125 |      | 720  | 2065 |      | 3357 |      |
|       |      | 171 |      | 1228 | 1271 |      | 5287 |      |
|       |      | 185 |      | 561  | 2150 |      | 5010 |      |
| Exp 7 | RSCF | 241 | 2616 | 5292 | 6171 | 1239 | 3598 | 993  |
|       |      | 221 | 2523 | 3581 | 5260 | 457  | 2180 | 965  |
|       |      | 363 | 3012 | 3262 | 8079 | 818  | 2423 | 915  |
|       | MR   | 242 | 2419 | 3660 | 6303 | 584  | 2571 | 1171 |
|       |      | 166 | 789  | 1335 | 203  | 276  | 210  | 160  |
|       |      | 180 | 167  | 224  | 185  | 212  | 474  | 615  |
|       | GR   | 214 | 151  | 176  | 198  | 213  | 188  | 173  |
|       |      | 330 | 220  | 219  | 1000 | 224  | 195  | 151  |
|       |      | 246 | 242  | 185  | 255  | 206  | 590  | 171  |

**Table S4. Raw luciferase data for Fig. 5a.** Raw luminescence data for activation of HRE-luc by HSV-1 at increasing multiplicities of infection, in control RSCF siRNA, MR-specific or GR-specific siRNA. Values represent raw relative luminescent units from seven independent experiments carried out in triplicate. Exp, experiment.

|       | pCR3 | VP16  | ICP4 | ICP22 | ICP27 | ICP0 |
|-------|------|-------|------|-------|-------|------|
| Exp 1 | 953  | 4947  | 3227 | 310   | 88    | 435  |
|       | 1317 | 11524 | 4771 | 330   | 105   | 505  |
|       | 572  | 4480  | 4481 | 617   | 749   | 501  |
| Exp 2 | 569  | 1866  | 1784 | 134   | 211   | 358  |
|       | 340  | 2575  | 2668 | 1211  | 274   | 532  |
|       | 669  | 2436  | 3802 | 1101  | 1267  | 450  |
| Exp 3 | 284  | 2634  | 2443 | 894   | 220   | 384  |
|       | 463  | 2105  | 3009 | 964   | 292   | 365  |
|       | 353  | 3393  | 4660 | 991   | 1267  | 359  |
| Exp 4 | 1380 | 2032  | 626  | 780   | 104   |      |
|       | 1105 | 1939  | 612  | 1021  | 90    |      |
|       | 1260 | 2277  | 869  | 874   | 85    |      |

**Table S5. Raw luciferase data for Fig. 6a.** Activation of HRE-luc reporter by HSV-1 transcription factors. Values represent raw relative luminescent units from four independent experiments carried out in triplicate. Exp, experiment.

|              | Exp 1 |       |       | Exp 2 |       |       | Exp 3 |       |       | Exp 4 |      |       |
|--------------|-------|-------|-------|-------|-------|-------|-------|-------|-------|-------|------|-------|
|              | pCR3  | VP16  | ICP4  | pCR3  | VP16  | ICP4  | pCR3  | VP16  | ICP4  | pCR3  | VP16 | ICP4  |
| <b>API</b>   | 693   | 296   | 102   | 390   | 935   | 1054  | 353   | 514   | 1868  | 713   | 304  | 2581  |
|              | 901   | 272   | 128   | 473   | 771   | 1319  | 276   | 591   | 1814  | 757   | 316  | 2614  |
|              | 837   | 180   | 132   | 523   | 796   | 3066  | 469   | 986   | 1407  | 956   | 411  | 2197  |
| <b>NF-KB</b> | 11575 | 6133  | 22173 | 11630 | 21543 | 26677 | 11070 | 10928 | 18567 | 24590 | 9426 | 21675 |
|              | 11514 | 4074  | 15634 | 10224 | 14179 | 24352 | 11292 | 10339 | 15833 | 24095 | 8225 | 29099 |
|              | 13140 | 3060  | 11542 | 14269 | 17880 | 25848 | 12091 | 16312 | 16510 | 38397 | 9741 | 36032 |
| <b>IFN-B</b> | 204   | 129   | 319   | 328   | 405   | 3960  | 258   | 273   | 2920  | 449   | 283  | 2053  |
|              | 78    | 87    | 239   | 223   | 231   | 3062  | 199   | 279   | 2235  | 287   | 118  | 2467  |
|              | 39    | 131   | 444   | 310   | 294   | 3440  | 183   | 200   | 3469  | 286   | 144  | 2368  |
| <b>ISRE</b>  | 957   | 762   | 1028  | 553   | 1236  | 755   | 315   | 784   | 779   | 642   | 461  | 312   |
|              | 879   | 885   | 1205  | 411   | 1007  | 944   | 347   | 564   | 745   | 606   | 565  | 214   |
|              | 696   | 723   | 1215  | 497   | 1203  | 658   | 394   | 592   | 617   | 604   | 529  | 175   |
| <b>HRE</b>   | 953   | 4947  | 3227  | 569   | 1866  | 1784  | 284   | 2634  | 2443  | 1380  | 2032 | 626   |
|              | 1317  | 11524 | 4771  | 340   | 2575  | 2668  | 463   | 2105  | 3009  | 1105  | 1939 | 612   |
|              | 572   | 4480  | 4481  | 669   | 2436  | 3802  | 353   | 3393  | 4660  | 1260  | 2277 | 869   |

**Table S6. Raw luciferase data for Fig. 6b.** Activation of a panel of luciferase promoter element reporters by the HSV-1 transcription factors VP16 and ICP4. Values represent raw relative luminescent units from four independent experiments carried out in triplicate. Exp, experiment.

|      | pCR3 |      |       |       | Oct1  |       | VP16  | VP16 + Oct1 |
|------|------|------|-------|-------|-------|-------|-------|-------------|
|      | pCR3 | MR   | VP16  | Oct1  | MR    | VP16  | MR    | MR          |
| Exp1 | 5469 | 7534 | 18374 | 13754 | 13680 | 44880 | 21343 | 37927       |
|      | 4812 | 3858 | 10260 | 7689  | 9403  | 37975 | 15599 | 34082       |
|      | 6084 | 6062 | 16765 | 16801 | 20993 | 35679 | 19473 | 54627       |
| Exp2 | 6645 | 5877 | 17364 | 6182  | 4093  | 13112 | 10658 | 10959       |
|      | 6201 | 3672 | 11717 | 2899  | 3982  | 13663 | 19978 | 10823       |
|      | 9145 | 7806 | 15113 | 9183  | 7058  | 24129 | 17570 | 14489       |
| Exp3 | 2651 | 769  | 5889  | 725   | 2354  | 6993  | 8191  | 24511       |
|      | 3190 | 860  | 8129  | 2219  | 3017  | 15060 | 14506 | 23614       |
|      | 2024 | 675  | 9232  | 1194  | 3165  | 12621 | 9617  | 18430       |

**Table S7. Raw luciferase data for Fig. 6c.** Synergistic activation of HRE-luc by MR, VP16 and Oct1. Values represent raw relative luminescent units from three independent experiments carried out in triplicate. Exp, experiment number.

|      | pCR3   |        |         |        | Oct1   |         | VP16    | VP16 + Oct1 |
|------|--------|--------|---------|--------|--------|---------|---------|-------------|
|      | pCR3   | MR     | VP16    | Oct1   | MR     | VP16    | MR      | MR          |
| Exp1 | 177104 | 176303 | 876966  | 250747 | 359638 | 1098582 | 920930  | 949946      |
|      | 239365 | 270227 | 879860  | 208415 | 225185 | 900390  | 1364260 | 1459285     |
|      | 214645 | 286086 | 1181493 | 282201 | 323592 | 1151878 | 1371966 | 1197649     |
| Exp2 | 182679 | 319510 | 1086427 | 326996 | 377673 | 871172  | 701504  | 1008858     |
|      | 307526 | 306324 | 649425  | 214876 | 162659 | 486951  | 812683  | 549475      |
|      | 286017 | 409813 | 1109041 | 343582 | 416750 | 1136559 | 1003496 | 1365851     |
| Exp3 | 44250  | 29084  | 207561  | 29153  | 32917  | 270245  | 349980  | 604934      |
|      | 69114  | 26785  | 247782  | 24287  | 22218  | 122779  | 205906  | 220848      |
|      | 75883  | 38175  | 240338  | 12218  | 44997  | 212367  | 338951  | 358058      |

**Table S8. Raw luciferase data for Fig. S3c.** Synergistic activation of ICP4-luc by MR, VP16 and Oct1. Values represent raw relative luminescent units from three independent experiments carried out in triplicate. Exp, experiment number.
